# Supplementary material
Source: PubMed Central journal article supplement (PMC11131505)
Supplement: 18_2008_8409_MOESM1_ESM.pdf [file 18_2008_8409_MOESM1_ESM.pdf]

## Electronic supplementary material

### Supplementary Figure

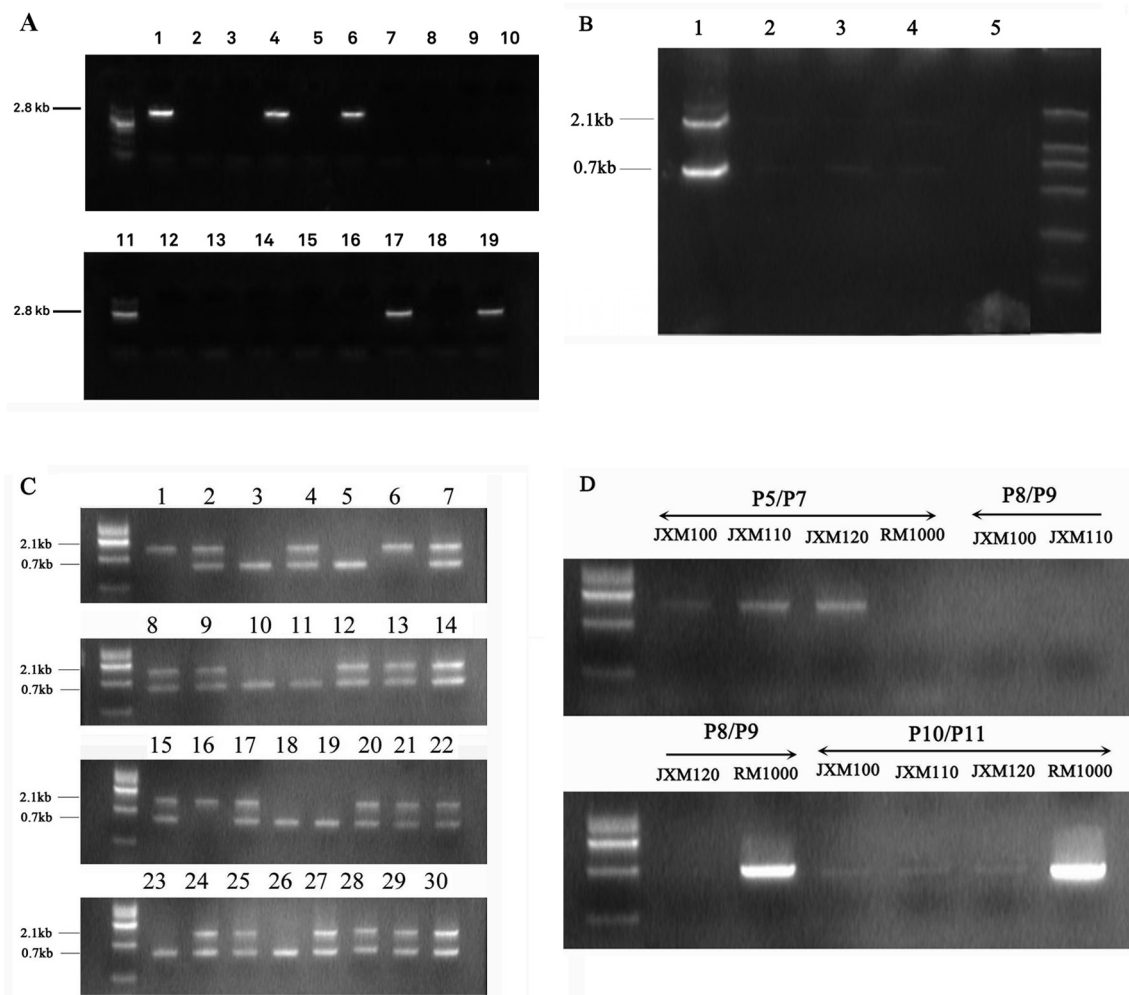

**Figure 1.** (A) Strains, with the first allele of *RTA2* deleted, yielded 2.8 kb product by PCR analysis with primers P5 (specific to *RTA2*) and P7 (specific to *URA3*). (B) After selection on 5-FOA, one positive transformant (JXM10) yielded 2.1 and 0.7 kb products by PCR analysis with primers P5 and P6 (specific for the *RTA2* gene); the two products were correspond to the sizes expected from the *Arta2::hisG* disrupted allele and the wild-type allele, respectively. (C) Strains, with both alleles of *RTA2* deleted, yielded only one 2.1 kb PCR product, corresponding to that of the *Arta2::hisG* disrupted allele. (D) The absence of a product using primers inside and outside the disruption fragment of the gene (primer pairs 8 and 9 and 10 and 11) also confirmed that the *RTA2* sequence had not relocated to another position in the genome.
