# Supplementary material
Source: PubMed Central journal article supplement (PMC11131505)
Supplement: 18_2008_8409_MOESM2_ESM.pdf [file 18_2008_8409_MOESM2_ESM.pdf]

## Electronic supplementary material

### Supplementary Table

**Table 1.** Primer Sequences.

|    | Name*                                                                      | Sequence**                                          |
|----|----------------------------------------------------------------------------|-----------------------------------------------------|
|    | <b>Primers used in disruption of <i>RTA2</i> gene</b>                      |                                                     |
| 1  | RTA2up FWD                                                                 | ccgctcgagCCACCACTGAAACAGATTGG                       |
| 2  | RTA2up RV                                                                  | ctgacggatccgagtcCAACACTCGTCCTAAGAACC                |
| 3  | RTA2down FWD                                                               | gactcggatccgctcagGCTGGTATTGCTGCTCAAG                |
| 4  | RTA2down RV                                                                | ggaattccatagCTTCAGCCAATTCTGCCAC                     |
|    | <b>Primers used for monitoring the <i>RTA2</i> disruption</b>              |                                                     |
| 5  | RTA2 chk FWD                                                               | TAGCTACCGCTACTGATAGTC                               |
| 6  | RTA2 chk RV                                                                | GATGACCTCTTACCGATTTGAC                              |
| 7  | URA3 chk RV                                                                | CATGAGTTTCTGCTCTCTCAC                               |
| 8  | RTA2up chk FWD                                                             | CCCAAAAATGAGACCGAAGG                                |
| 9  | RTA2up chk RV                                                              | CTGCCATGATGAATGCAGG                                 |
| 10 | RTA2down chk FWD                                                           | TTTTCATCACTGCCGACG                                  |
| 11 | RTA2down chk RV                                                            | CGATGACTTTTGGTACGCAC                                |
| 12 | RP10 chk FWD                                                               | CTCAAAACGTAATCGTCGGAAG                              |
|    | <b>Primers used for amplifying <i>RTA2</i> ORF</b>                         |                                                     |
| 13 | RTA2 FWD                                                                   | gcgggatccTCCCACCCTTCAACTATGAG                       |
| 14 | RTA2 RV                                                                    | tgcaactcagCGATGACTTTTGGTACGCAC                      |
|    | <b>Primers used for amplifying hybridization probe of <i>RTA2</i> gene</b> |                                                     |
|    | RTA2up FWD                                                                 | GCTGTGCTATGTAAAGCTAGG                               |
|    | RTA2up RV                                                                  | AGCTAACACTTTTTCTGCCG                                |
|    | <b>Primers used in quantitative RT-PCR</b>                                 |                                                     |
|    | 18S                                                                        | F: GTGCCAGCAGCCGCGGTA<br>R: TGGACCGGCCAGCCAAGC      |
|    | RTA2                                                                       | F: CGGTAAGAGGTCATCGTCATAC<br>R: TCAGCCAATTCTGCCACTC |

\* FWD, forward; RV, reverse; chk, check.

\*\* restriction sites are in lower case.
